# Supplementary material
Source: Royal Society of Chemistry journal article supplement (doi:10.1039/d6en00403b)
Supplement: d6en00403b1.pdf [file d6en00403b1.pdf]

**Table S1. Weekly variation in available nitrogen (mg kg<sup>-1</sup>) during incubation under different nitrogen treatments.**

| Treatment    | Week 1       | Week 2       | Week 3       | Week 4       | Week 5       | Week 6       | Week 7       | Week 8       | Week 9       | Week 10      |
|--------------|--------------|--------------|--------------|--------------|--------------|--------------|--------------|--------------|--------------|--------------|
| L1           | 110.6 ± 0.27 | 112.7 ± 1.23 | 113.1 ± 0.82 | 113.7 ± 2.84 | 107.4 ± 1.73 | 104.7 ± 0.33 | 101.4 ± 1.42 | 98.6 ± 2.36  | 96.4 ± 1.3   | 93.1 ± 0.29  |
| L2           | 174.5 ± 3.93 | 178.1 ± 0.37 | 183.4 ± 4.29 | 181.4 ± 0.19 | 177.1 ± 2.3  | 172.5 ± 1.62 | 164.5 ± 0.94 | 161.7 ± 0.67 | 154.9 ± 1.05 | 152.4 ± 0.63 |
| L3           | 168.4 ± 3.52 | 173.5 ± 1.26 | 177.8 ± 2.41 | 176.1 ± 1.65 | 172.5 ± 1.97 | 169.4 ± 3.53 | 161.8 ± 2.27 | 155.1 ± 3.87 | 152.4 ± 3.65 | 149.1 ± 0.16 |
| L4           | 162.4 ± 3.52 | 167.4 ± 0.87 | 172.3 ± 2.42 | 174.8 ± 1.36 | 179.6 ± 2.34 | 172.5 ± 1.97 | 170.4 ± 3.81 | 167.5 ± 4.01 | 161.8 ± 3.03 | 154.7 ± 2.66 |
| L5           | 141.6 ± 3.2  | 145.3 ± 3.63 | 149.7 ± 2.65 | 147.4 ± 2.38 | 142.5 ± 2.82 | 139.4 ± 3.12 | 136.7 ± 1.99 | 134.1 ± 1.4  | 131.7 ± 2.06 | 129.1 ± 1.75 |
| L6           | 146.5 ± 2.79 | 148.4 ± 1.62 | 151.7 ± 2.29 | 152.9 ± 1.03 | 151.1 ± 0.55 | 144.8 ± 3.01 | 142.1 ± 2.51 | 136.8 ± 3.2  | 135.1 ± 0.07 | 131.5 ± 0.62 |
| L7           | 148.1 ± 2.34 | 151.7 ± 0.16 | 154.5 ± 1.61 | 155.9 ± 1.7  | 160.7 ± 2.34 | 157.9 ± 2.79 | 152.1 ± 3.09 | 147.3 ± 0.77 | 140.1 ± 3.57 | 133.9 ± 3    |
| L8           | 142.2 ± 0.04 | 144.1 ± 3.67 | 147.9 ± 2.77 | 153.4 ± 3.03 | 156.8 ± 0.24 | 161.1 ± 1.26 | 157.9 ± 3.04 | 155.4 ± 1.37 | 147.1 ± 0.84 | 142.4 ± 0.44 |
| L9           | 138.5 ± 1.68 | 140.2 ± 0.07 | 143.4 ± 2.61 | 147.8 ± 3.38 | 150.4 ± 0.11 | 154.6 ± 2.9  | 158.4 ± 1.15 | 156.1 ± 2.11 | 150.2 ± 0.08 | 144.6 ± 3.16 |
| L10          | 140.2 ± 2.05 | 142.1 ± 2.74 | 145.3 ± 1.36 | 148.4 ± 1.08 | 150.6 ± 2.35 | 153.7 ± 3.28 | 156.3 ± 1.55 | 154.7 ± 2.25 | 149.4 ± 1.32 | 146.1 ± 0.3  |
| S.Ed (±)     | 3.764        | 2.857        | 3.519        | 2.969        | 2.719        | 3.644        | 3.327        | 3.500        | 2.991        | 2.462        |
| C.D (p=0.05) | 7.851        | 5.959        | 7.342        | 6.192        | 5.672        | 7.602        | 6.940        | 7.301        | 6.240        | 5.135        |

Values represent mean ± standard error (n = 3). S.Ed: standard error of difference; C.D.: critical difference at p = 0.05  
L1: Absolute control; L2: 100% N as urea; L3: 75% N as urea; L4: 75% N as urea + 25% N as nano urea; L5: 50% N as urea; L6: 50% N as urea + 25% N as nano urea; L7: 50% N as urea + 50% N as nano urea; L8: 25% N as urea + 75% N as nano urea; L9: 75% N as nano urea; L10: 100% N as nano urea.

**Table S2. Elovich model parameters describing nitrogen release dynamics under different nitrogen treatments.**

| <b>Treatmen<br/>t</b> | <b>Peak<br/>week</b> | <b>Maximum net release, <math>q_{\max}</math><br/>(ppm)</b> | <b>Elovich constant,<br/><math>\beta</math></b> | <b><math>R^2</math></b> |
|-----------------------|----------------------|-------------------------------------------------------------|-------------------------------------------------|-------------------------|
| L2                    | 3                    | 8.9                                                         | 0.131                                           | 1.000                   |
| L3                    | 3                    | 9.4                                                         | 0.161                                           | 1.000                   |
| L4                    | 5                    | 17.2                                                        | 0.121                                           | 0.981                   |
| L5                    | 3                    | 8.1                                                         | 0.158                                           | 1.000                   |
| L6                    | 4                    | 6.4                                                         | 0.240                                           | 0.995                   |
| L7                    | 5                    | 12.6                                                        | 0.172                                           | 0.936                   |
| L8                    | 6                    | 18.9                                                        | 0.096                                           | 0.966                   |
| L9                    | 7                    | 19.9                                                        | 0.101                                           | 0.948                   |
| L10                   | 7                    | 16.1                                                        | 0.129                                           | 0.967                   |

$q_{\max}$  represents the maximum net nitrogen release calculated as the difference between peak available N and initial available N. Elovich parameters were estimated from the ascending phase of nitrogen release.  $R^2$  denotes the coefficient of determination.

L2: 100% N as urea; L3: 75% N as urea; L4: 75% N as urea + 25% N as nano urea; L5: 50% N as urea; L6: 50% N as urea + 25% N as nano urea; L7: 50% N as urea + 50% N as nano urea; L8: 25% N as urea + 75% N as nano urea; L9: 75% N as nano urea; L10: 100% N as nano urea

**Table S3. Temporal variation in cumulative ammonia (NH<sub>3</sub>-N) volatilization under different nitrogen treatments.**

| <b>Treatment</b>       | <b>Day 3</b>             | <b>Day 6</b>             | <b>Day 9</b>             | <b>Day 12</b>            | <b>Day 15</b>            | <b>Day 18</b>            | <b>Day 21</b> |
|------------------------|--------------------------|--------------------------|--------------------------|--------------------------|--------------------------|--------------------------|---------------|
| L1                     | 1.63 ± 0.01 <sup>e</sup> | 1.86 ± 0.01 <sup>f</sup> | 1.16 ± 0.01 <sup>h</sup> | 0.00 ± 0.00 <sup>g</sup> | 0.00 ± 0.00 <sup>g</sup> | 0.00 ± 0.00 <sup>f</sup> | 0.00          |
| L2                     | 5.83 ± 0.09 <sup>a</sup> | 6.06 ± 0.14 <sup>a</sup> | 4.90 ± 0.04 <sup>a</sup> | 3.96 ± 0.10 <sup>a</sup> | 2.33 ± 0.05 <sup>a</sup> | 1.63 ± 0.01 <sup>a</sup> | 0.00          |
| L3                     | 4.66 ± 0.09 <sup>b</sup> | 4.90 ± 0.01 <sup>b</sup> | 3.96 ± 0.06 <sup>b</sup> | 2.10 ± 0.01 <sup>c</sup> | 1.86 ± 0.01 <sup>b</sup> | 1.40 ± 0.03 <sup>b</sup> | 0.00          |
| L4                     | 4.66 ± 0.02 <sup>b</sup> | 5.13 ± 0.13 <sup>b</sup> | 3.50 ± 0.03 <sup>c</sup> | 2.33 ± 0.01 <sup>d</sup> | 1.63 ± 0.04 <sup>c</sup> | 0.93 ± 0.02 <sup>d</sup> | 0.00          |
| L5                     | 2.80 ± 0.07 <sup>c</sup> | 3.03 ± 0.06 <sup>d</sup> | 2.56 ± 0.03 <sup>g</sup> | 1.86 ± 0.05 <sup>f</sup> | 1.40 ± 0.02 <sup>d</sup> | 0.93 ± 0.02 <sup>d</sup> | 0.00          |
| L6                     | 2.80 ± 0.07 <sup>c</sup> | 3.26 ± 0.05 <sup>d</sup> | 3.03 ± 0.01 <sup>e</sup> | 2.10 ± 0.02 <sup>e</sup> | 1.16 ± 0.01 <sup>e</sup> | 0.00 ± 0.00 <sup>f</sup> | 0.00          |
| L7                     | 3.03 ± 0.08 <sup>c</sup> | 3.50 ± 0.07 <sup>c</sup> | 3.26 ± 0.03 <sup>d</sup> | 2.33 ± 0.01 <sup>d</sup> | 1.63 ± 0.04 <sup>c</sup> | 0.70 ± 0.01 <sup>e</sup> | 0.00          |
| L8                     | 3.03 ± 0.07 <sup>c</sup> | 3.73 ± 0.06 <sup>c</sup> | 3.50 ± 0.02 <sup>c</sup> | 3.03 ± 0.03 <sup>b</sup> | 1.86 ± 0.04 <sup>b</sup> | 1.16 ± 0.02 <sup>c</sup> | 0.00          |
| L9                     | 2.56 ± 0.04 <sup>d</sup> | 2.80 ± 0.06 <sup>e</sup> | 3.03 ± 0.02 <sup>e</sup> | 2.33 ± 0.03 <sup>d</sup> | 0.93 ± 0.01 <sup>f</sup> | 0.00 ± 0.00 <sup>f</sup> | 0.00          |
| L10                    | 2.33 ± 0.01 <sup>d</sup> | 2.56 ± 0.03 <sup>e</sup> | 2.80 ± 0.05 <sup>f</sup> | 2.56 ± 0.04 <sup>c</sup> | 1.40 ± 0.01 <sup>d</sup> | 0.00 ± 0.00 <sup>f</sup> | 0.00          |
| <b>S.Ed (±)</b>        | <b>0.09</b>              | <b>0.11</b>              | <b>0.05</b>              | <b>0.06</b>              | <b>0.04</b>              | <b>0.02</b>              | –             |
| <b>C.D. (p = 0.05)</b> | <b>0.19</b>              | <b>0.22</b>              | <b>0.10</b>              | <b>0.12</b>              | <b>0.09</b>              | <b>0.04</b>              | –             |

Values represent mean ± standard error (n = 3). S.Ed: standard error of difference; C.D.: critical difference at p = 0.05. L1: Absolute control; L2: 100% N as urea; L3: 75% N as urea; L4: 75% N as urea + 25% N as nano urea; L5: 50% N as urea; L6: 50% N as urea + 25% N as nano urea; L7: 50% N as urea + 50% N as nano urea; L8: 25% N as urea + 75% N as nano urea; L9: 75% N as nano urea; L10: 100% N as nano urea.

**Table S4. Weekly nitrate-N recovered in leachate (mg kg<sup>-1</sup> soil) from soil columns monitored at 10, 20 and 30 cm depths under different nitrogen treatments.**

**(A) 10 cm depth**

| Treatment           | Week 1                    | Week 2                    | Week 3                    | Week 4                    | Week 5                    | Week 6                    | Week 7                    | Week 8                   | Week 9                   | Week 10                  |
|---------------------|---------------------------|---------------------------|---------------------------|---------------------------|---------------------------|---------------------------|---------------------------|--------------------------|--------------------------|--------------------------|
| L1                  | 3.72 ± 0.09 <sup>f</sup>  | 4.65 ± 0.11 <sup>h</sup>  | 4.65 ± 0.05 <sup>h</sup>  | 5.60 ± 0.12 <sup>h</sup>  | 7.45 ± 0.15 <sup>g</sup>  | 5.60 ± 0.00 <sup>h</sup>  | 4.65 ± 0.05 <sup>g</sup>  | 3.72 ± 0.07 <sup>e</sup> | 2.80 ± 0.01 <sup>d</sup> | 2.80 ± 0.06 <sup>b</sup> |
| L2                  | 14.00 ± 0.11 <sup>a</sup> | 14.92 ± 0.17 <sup>a</sup> | 15.85 ± 0.23 <sup>a</sup> | 17.72 ± 0.17 <sup>a</sup> | 14.92 ± 0.02 <sup>b</sup> | 11.20 ± 0.17 <sup>d</sup> | 10.25 ± 0.10 <sup>b</sup> | 7.45 ± 0.16 <sup>a</sup> | 5.60 ± 0.14 <sup>a</sup> | 3.72 ± 0.07 <sup>a</sup> |
| L3                  | 12.12 ± 0.02 <sup>b</sup> | 13.05 ± 0.29 <sup>c</sup> | 14.00 ± 0.03 <sup>c</sup> | 14.92 ± 0.03 <sup>b</sup> | 14.00 ± 0.07 <sup>c</sup> | 12.12 ± 0.16 <sup>c</sup> | 10.25 ± 0.04 <sup>b</sup> | 6.52 ± 0.08 <sup>b</sup> | 4.65 ± 0.09 <sup>b</sup> | 2.80 ± 0.07 <sup>b</sup> |
| L4                  | 12.12 ± 0.14 <sup>b</sup> | 14.00 ± 0.15 <sup>b</sup> | 14.92 ± 0.08 <sup>b</sup> | 14.92 ± 0.19 <sup>b</sup> | 16.80 ± 0.29 <sup>a</sup> | 14.00 ± 0.16 <sup>b</sup> | 12.12 ± 0.21 <sup>a</sup> | 7.45 ± 0.15 <sup>a</sup> | 3.72 ± 0.03 <sup>c</sup> | 2.80 ± 0.04 <sup>b</sup> |
| L5                  | 7.45 ± 0.11 <sup>d</sup>  | 8.40 ± 0.07 <sup>g</sup>  | 9.32 ± 0.14 <sup>g</sup>  | 7.45 ± 0.13 <sup>g</sup>  | 6.52 ± 0.11 <sup>h</sup>  | 6.52 ± 0.07 <sup>g</sup>  | 5.60 ± 0.01 <sup>f</sup>  | 4.65 ± 0.11 <sup>d</sup> | 3.72 ± 0.09 <sup>c</sup> | 2.80 ± 0.01 <sup>b</sup> |
| L6                  | 7.45 ± 0.10 <sup>d</sup>  | 9.32 ± 0.01 <sup>f</sup>  | 10.25 ± 0.09 <sup>f</sup> | 9.32 ± 0.24 <sup>f</sup>  | 8.40 ± 0.15 <sup>f</sup>  | 7.45 ± 0.03 <sup>f</sup>  | 6.52 ± 0.16 <sup>e</sup>  | 5.60 ± 0.09 <sup>c</sup> | 4.65 ± 0.06 <sup>b</sup> | 2.80 ± 0.01 <sup>b</sup> |
| L7                  | 8.40 ± 0.06 <sup>c</sup>  | 10.25 ± 0.19 <sup>e</sup> | 11.20 ± 0.10 <sup>e</sup> | 12.12 ± 0.14 <sup>d</sup> | 10.25 ± 0.02 <sup>e</sup> | 8.40 ± 0.02 <sup>e</sup>  | 7.45 ± 0.09 <sup>d</sup>  | 3.72 ± 0.02 <sup>e</sup> | 3.72 ± 0.03 <sup>c</sup> | 2.80 ± 0.02 <sup>b</sup> |
| L8                  | 8.40 ± 0.07 <sup>c</sup>  | 11.20 ± 0.24 <sup>d</sup> | 12.12 ± 0.08 <sup>d</sup> | 14.00 ± 0.12 <sup>c</sup> | 13.05 ± 0.24 <sup>d</sup> | 8.40 ± 0.21 <sup>e</sup>  | 7.45 ± 0.02 <sup>d</sup>  | 4.65 ± 0.03 <sup>d</sup> | 3.72 ± 0.03 <sup>c</sup> | 2.80 ± 0.00 <sup>b</sup> |
| L9                  | 7.45 ± 0.04 <sup>d</sup>  | 9.32 ± 0.14 <sup>f</sup>  | 11.20 ± 0.03 <sup>e</sup> | 12.12 ± 0.20 <sup>d</sup> | 13.05 ± 0.32 <sup>d</sup> | 8.40 ± 0.21 <sup>e</sup>  | 5.60 ± 0.06 <sup>f</sup>  | 5.60 ± 0.11 <sup>c</sup> | 4.65 ± 0.05 <sup>b</sup> | 2.80 ± 0.02 <sup>b</sup> |
| L10                 | 6.52 ± 0.12 <sup>c</sup>  | 8.40 ± 0.05 <sup>g</sup>  | 10.25 ± 0.20 <sup>f</sup> | 11.20 ± 0.10 <sup>e</sup> | 13.05 ± 0.33 <sup>d</sup> | 14.92 ± 0.27 <sup>a</sup> | 8.40 ± 0.09 <sup>c</sup>  | 7.45 ± 0.07 <sup>a</sup> | 4.65 ± 0.02 <sup>b</sup> | 2.80 ± 0.01 <sup>b</sup> |
| <b>S.Ed (±)</b>     | <b>0.131</b>              | <b>0.233</b>              | <b>0.172</b>              | <b>0.216</b>              | <b>0.289</b>              | <b>0.225</b>              | <b>0.146</b>              | <b>0.139</b>             | <b>0.093</b>             | <b>0.055</b>             |
| <b>C.D (p=0.05)</b> | <b>0.273</b>              | <b>0.487</b>              | <b>0.36</b>               | <b>0.45</b>               | <b>0.603</b>              | <b>0.469</b>              | <b>0.305</b>              | <b>0.29</b>              | <b>0.195</b>             | <b>0.114</b>             |

Values represent mean ± standard error (n = 3). S.Ed: standard error of difference; C.D.: critical difference at p = 0.05. L1: Absolute control; L2: 100% N as urea; L3: 75% N as urea; L4: 75% N as urea + 25% N as nano urea; L5: 50% N as urea; L6: 50% N as urea + 25% N as nano urea; L7: 50% N as urea + 50% N as nano urea; L8: 25% N as urea + 75% N as nano urea; L9: 75% N as nano urea; L10: 100% N as nano urea.

**(B) 20 cm depth**

| Treatment    | Week 1                    | Week 2                    | Week 3                    | Week 4                    | Week 5                    | Week 6                    | Week 7                    | Week 8                   | Week 9                   | Week 10                  |
|--------------|---------------------------|---------------------------|---------------------------|---------------------------|---------------------------|---------------------------|---------------------------|--------------------------|--------------------------|--------------------------|
| L1           | 4.65 ± 0.12 <sup>g</sup>  | 6.52 ± 0.02 <sup>i</sup>  | 7.45 ± 0.01 <sup>h</sup>  | 7.45 ± 0.12 <sup>h</sup>  | 8.40 ± 0.14 <sup>h</sup>  | 6.52 ± 0.15 <sup>h</sup>  | 4.65 ± 0.04 <sup>h</sup>  | 3.72 ± 0.04 <sup>f</sup> | 3.72 ± 0.04 <sup>d</sup> | 2.80 ± 0.06 <sup>c</sup> |
| L2           | 14.92 ± 0.35 <sup>a</sup> | 15.85 ± 0.37 <sup>a</sup> | 16.80 ± 0.15 <sup>a</sup> | 18.65 ± 0.02 <sup>a</sup> | 15.85 ± 0.14 <sup>b</sup> | 12.12 ± 0.02 <sup>d</sup> | 11.20 ± 0.16 <sup>b</sup> | 8.40 ± 0.08 <sup>a</sup> | 6.52 ± 0.12 <sup>a</sup> | 4.65 ± 0.04 <sup>a</sup> |
| L3           | 13.05 ± 0.06 <sup>b</sup> | 14.00 ± 0.27 <sup>c</sup> | 14.92 ± 0.13 <sup>c</sup> | 15.85 ± 0.40 <sup>b</sup> | 14.92 ± 0.19 <sup>c</sup> | 13.05 ± 0.26 <sup>c</sup> | 11.20 ± 0.20 <sup>b</sup> | 7.45 ± 0.18 <sup>b</sup> | 5.60 ± 0.08 <sup>b</sup> | 3.72 ± 0.05 <sup>b</sup> |
| L4           | 13.05 ± 0.04 <sup>b</sup> | 14.92 ± 0.16 <sup>b</sup> | 15.85 ± 0.21 <sup>b</sup> | 15.85 ± 0.36 <sup>b</sup> | 17.72 ± 0.17 <sup>a</sup> | 14.92 ± 0.24 <sup>b</sup> | 13.05 ± 0.16 <sup>a</sup> | 8.40 ± 0.20 <sup>a</sup> | 4.65 ± 0.12 <sup>c</sup> | 3.72 ± 0.03 <sup>b</sup> |
| L5           | 8.40 ± 0.12 <sup>d</sup>  | 9.32 ± 0.01 <sup>g</sup>  | 10.25 ± 0.03 <sup>g</sup> | 8.40 ± 0.00 <sup>g</sup>  | 7.45 ± 0.07 <sup>i</sup>  | 7.45 ± 0.07 <sup>g</sup>  | 6.52 ± 0.07 <sup>f</sup>  | 5.60 ± 0.01 <sup>d</sup> | 4.65 ± 0.04 <sup>c</sup> | 3.72 ± 0.06 <sup>b</sup> |
| L6           | 8.40 ± 0.17 <sup>d</sup>  | 10.25 ± 0.05 <sup>f</sup> | 11.17 ± 0.15 <sup>f</sup> | 10.25 ± 0.23 <sup>f</sup> | 9.32 ± 0.10 <sup>g</sup>  | 8.40 ± 0.08 <sup>f</sup>  | 7.45 ± 0.12 <sup>c</sup>  | 6.52 ± 0.14 <sup>c</sup> | 5.60 ± 0.01 <sup>b</sup> | 3.72 ± 0.04 <sup>b</sup> |
| L7           | 9.32 ± 0.04 <sup>c</sup>  | 11.20 ± 0.28 <sup>e</sup> | 12.12 ± 0.05 <sup>e</sup> | 13.05 ± 0.25 <sup>d</sup> | 11.20 ± 0.17 <sup>f</sup> | 9.32 ± 0.04 <sup>c</sup>  | 8.40 ± 0.07 <sup>d</sup>  | 4.65 ± 0.05 <sup>e</sup> | 4.65 ± 0.07 <sup>c</sup> | 3.72 ± 0.07 <sup>b</sup> |
| L8           | 9.32 ± 0.16 <sup>c</sup>  | 12.12 ± 0.21 <sup>d</sup> | 13.05 ± 0.06 <sup>d</sup> | 14.92 ± 0.25 <sup>c</sup> | 14.00 ± 0.28 <sup>d</sup> | 9.32 ± 0.01 <sup>c</sup>  | 8.40 ± 0.08 <sup>d</sup>  | 5.60 ± 0.06 <sup>d</sup> | 4.65 ± 0.11 <sup>c</sup> | 3.72 ± 0.03 <sup>b</sup> |
| L9           | 7.45 ± 0.12 <sup>e</sup>  | 8.40 ± 0.15 <sup>h</sup>  | 11.20 ± 0.09 <sup>f</sup> | 12.12 ± 0.18 <sup>e</sup> | 13.05 ± 0.26 <sup>c</sup> | 15.85 ± 0.14 <sup>a</sup> | 5.60 ± 0.11 <sup>g</sup>  | 6.52 ± 0.08 <sup>c</sup> | 5.60 ± 0.08 <sup>b</sup> | 3.72 ± 0.05 <sup>b</sup> |
| L10          | 6.52 ± 0.02 <sup>f</sup>  | 9.32 ± 0.01 <sup>g</sup>  | 11.17 ± 0.13 <sup>f</sup> | 12.12 ± 0.06 <sup>c</sup> | 14.00 ± 0.04 <sup>d</sup> | 15.85 ± 0.26 <sup>a</sup> | 9.32 ± 0.07 <sup>c</sup>  | 8.37 ± 0.07 <sup>a</sup> | 5.60 ± 0.01 <sup>b</sup> | 3.72 ± 0.00 <sup>b</sup> |
| S.Ed (±)     | <b>0.212</b>              | <b>0.278</b>              | <b>0.166</b>              | <b>0.323</b>              | <b>0.242</b>              | <b>0.225</b>              | <b>0.17</b>               | <b>0.155</b>             | <b>0.11</b>              | <b>0.067</b>             |
| C.D (p=0.05) | <b>0.443</b>              | <b>0.579</b>              | <b>0.346</b>              | <b>0.673</b>              | <b>0.504</b>              | <b>0.47</b>               | <b>0.354</b>              | <b>0.323</b>             | <b>0.229</b>             | <b>0.14</b>              |

Values represent mean ± standard error (n = 3). S.Ed: standard error of difference; C.D.: critical difference at p = 0.05. L1: Absolute control; L2: 100% N as urea; L3: 75% N as urea; L4: 75% N as urea + 25% N as nano urea; L5: 50% N as urea; L6: 50% N as urea + 25% N as nano urea; L7: 50% N as urea + 50% N as nano urea; L8: 25% N as urea + 75% N as nano urea; L9: 75% N as nano urea; L10: 100% N as nano urea.

**(C) 30 cm depth**

| Treatment    | Week 1                    | Week 2                    | Week 3                    | Week 4                    | Week 5                    | Week 6                    | Week 7                    | Week 8                   | Week 9                   | Week 10                  |
|--------------|---------------------------|---------------------------|---------------------------|---------------------------|---------------------------|---------------------------|---------------------------|--------------------------|--------------------------|--------------------------|
| L1           | 4.65 ± 0.00 <sup>f</sup>  | 5.60 ± 0.06 <sup>i</sup>  | 8.40 ± 0.21 <sup>h</sup>  | 9.32 ± 0.10 <sup>g</sup>  | 9.32 ± 0.18 <sup>h</sup>  | 10.25 ± 0.10 <sup>f</sup> | 7.45 ± 0.05 <sup>f</sup>  | 4.65 ± 0.06 <sup>f</sup> | 3.72 ± 0.09 <sup>d</sup> | 2.80 ± 0.07 <sup>c</sup> |
| L2           | 15.85 ± 0.05 <sup>a</sup> | 16.80 ± 0.18 <sup>a</sup> | 17.72 ± 0.44 <sup>a</sup> | 19.60 ± 0.14 <sup>a</sup> | 16.80 ± 0.35 <sup>b</sup> | 13.05 ± 0.08 <sup>d</sup> | 12.12 ± 0.10 <sup>b</sup> | 9.32 ± 0.12 <sup>a</sup> | 7.45 ± 0.02 <sup>a</sup> | 5.52 ± 0.13 <sup>a</sup> |
| L3           | 14.00 ± 0.31 <sup>b</sup> | 14.92 ± 0.03 <sup>c</sup> | 15.85 ± 0.14 <sup>c</sup> | 16.80 ± 0.31 <sup>b</sup> | 15.85 ± 0.35 <sup>c</sup> | 14.00 ± 0.07 <sup>c</sup> | 12.12 ± 0.15 <sup>b</sup> | 8.40 ± 0.01 <sup>b</sup> | 6.52 ± 0.08 <sup>b</sup> | 4.65 ± 0.01 <sup>b</sup> |
| L4           | 14.00 ± 0.27 <sup>b</sup> | 15.85 ± 0.18 <sup>b</sup> | 16.80 ± 0.15 <sup>b</sup> | 16.80 ± 0.24 <sup>b</sup> | 18.65 ± 0.04 <sup>a</sup> | 15.85 ± 0.07 <sup>b</sup> | 14.00 ± 0.04 <sup>a</sup> | 9.32 ± 0.01 <sup>a</sup> | 5.60 ± 0.05 <sup>c</sup> | 4.65 ± 0.01 <sup>b</sup> |
| L5           | 9.32 ± 0.14 <sup>d</sup>  | 10.25 ± 0.17 <sup>g</sup> | 11.20 ± 0.17 <sup>g</sup> | 9.32 ± 0.05 <sup>g</sup>  | 8.40 ± 0.01 <sup>i</sup>  | 8.40 ± 0.03 <sup>h</sup>  | 7.45 ± 0.05 <sup>f</sup>  | 6.52 ± 0.14 <sup>d</sup> | 5.60 ± 0.14 <sup>c</sup> | 4.65 ± 0.04 <sup>b</sup> |
| L6           | 9.32 ± 0.13 <sup>d</sup>  | 11.20 ± 0.26 <sup>f</sup> | 12.10 ± 0.14 <sup>f</sup> | 11.20 ± 0.15 <sup>f</sup> | 10.25 ± 0.05 <sup>g</sup> | 9.32 ± 0.21 <sup>g</sup>  | 8.37 ± 0.18 <sup>c</sup>  | 7.45 ± 0.11 <sup>c</sup> | 6.52 ± 0.16 <sup>b</sup> | 4.65 ± 0.12 <sup>b</sup> |
| L7           | 10.25 ± 0.19 <sup>c</sup> | 12.12 ± 0.21 <sup>e</sup> | 13.05 ± 0.03 <sup>e</sup> | 14.00 ± 0.24 <sup>d</sup> | 12.12 ± 0.19 <sup>f</sup> | 10.25 ± 0.20 <sup>f</sup> | 9.32 ± 0.18 <sup>d</sup>  | 5.60 ± 0.06 <sup>c</sup> | 5.60 ± 0.10 <sup>c</sup> | 4.65 ± 0.05 <sup>b</sup> |
| L8           | 10.25 ± 0.21 <sup>c</sup> | 13.05 ± 0.29 <sup>d</sup> | 14.00 ± 0.33 <sup>d</sup> | 15.85 ± 0.38 <sup>c</sup> | 14.92 ± 0.33 <sup>d</sup> | 10.25 ± 0.03 <sup>f</sup> | 9.32 ± 0.09 <sup>d</sup>  | 6.52 ± 0.15 <sup>d</sup> | 5.60 ± 0.06 <sup>c</sup> | 4.65 ± 0.11 <sup>b</sup> |
| L9           | 9.32 ± 0.16 <sup>d</sup>  | 10.25 ± 0.03 <sup>g</sup> | 12.12 ± 0.22 <sup>f</sup> | 13.05 ± 0.10 <sup>c</sup> | 14.00 ± 0.27 <sup>c</sup> | 11.20 ± 0.23 <sup>e</sup> | 8.40 ± 0.17 <sup>c</sup>  | 7.45 ± 0.14 <sup>c</sup> | 6.52 ± 0.13 <sup>b</sup> | 4.65 ± 0.03 <sup>b</sup> |
| L10          | 7.45 ± 0.08 <sup>c</sup>  | 8.40 ± 0.06 <sup>h</sup>  | 11.20 ± 0.23 <sup>g</sup> | 13.05 ± 0.12 <sup>c</sup> | 15.85 ± 0.19 <sup>c</sup> | 16.80 ± 0.39 <sup>a</sup> | 11.20 ± 0.05 <sup>c</sup> | 9.32 ± 0.11 <sup>a</sup> | 6.52 ± 0.15 <sup>b</sup> | 4.65 ± 0.02 <sup>b</sup> |
| S.Ed (±)     | <b>0.251</b>              | <b>0.245</b>              | <b>0.33</b>               | <b>0.295</b>              | <b>0.328</b>              | <b>0.251</b>              | <b>0.169</b>              | <b>0.146</b>             | <b>0.155</b>             | <b>0.103</b>             |
| C.D (p=0.05) | <b>0.524</b>              | <b>0.511</b>              | <b>0.689</b>              | <b>0.615</b>              | <b>0.684</b>              | <b>0.524</b>              | <b>0.353</b>              | <b>0.305</b>             | <b>0.323</b>             | <b>0.215</b>             |

Values represent mean ± standard error (n = 3). S.Ed: standard error of difference; C.D.: critical difference at p = 0.05. L1: Absolute control; L2: 100% N as urea; L3: 75% N as urea; L4: 75% N as urea + 25% N as nano urea; L5: 50% N as urea; L6: 50% N as urea + 25% N as nano urea; L7: 50% N as urea + 50% N as nano urea; L8: 25% N as urea + 75% N as nano urea; L9: 75% N as nano urea; L10: 100% N as nano urea.

**Table S5. Nitrogen input supplied through soil and foliar application under different treatments**

| <b>Treatment</b> | <b>Soil-applied N (mg pot<sup>-1</sup>)</b> | <b>Foliar N (mg pot<sup>-1</sup>)</b> | <b>Total N applied (mg pot<sup>-1</sup>)</b> |
|------------------|---------------------------------------------|---------------------------------------|----------------------------------------------|
| T1               | 0                                           | 0                                     | 0                                            |
| T2               | 1250.00                                     | 0                                     | 1250.00                                      |
| T3               | 937.50                                      | 0                                     | 937.50                                       |
| T4               | 937.50                                      | 51.75                                 | 989.25                                       |
| T5               | 625.00                                      | 51.75                                 | 676.75                                       |
| T6               | 937.50                                      | 15.56                                 | 953.06                                       |
| T7               | 625.00                                      | 15.56                                 | 640.56                                       |
| T8               | 0                                           | 15.56                                 | 15.56                                        |

T1: Control (no nitrogen); T2: 100% N as <sup>15</sup>N-labelled urea; T3: 75% N as <sup>15</sup>N-labelled urea; T4: 75% N as <sup>15</sup>N-labelled urea + two foliar sprays of <sup>15</sup>N urea (1%); T5: 50% N as <sup>15</sup>N-labelled urea + two foliar sprays of <sup>15</sup>N urea (1%); T6: 75% N <sup>15</sup>N-labelled as urea + two foliar sprays of <sup>15</sup>N nano urea (0.7%); T7: 50% N as <sup>15</sup>N-labelled urea + two foliar sprays of <sup>15</sup>N nano urea (0.7%); T8: No soil-applied N + two foliar sprays of <sup>15</sup>N nano urea (0.7%).

## Ammonia volatilization estimation using Boric acid trap method

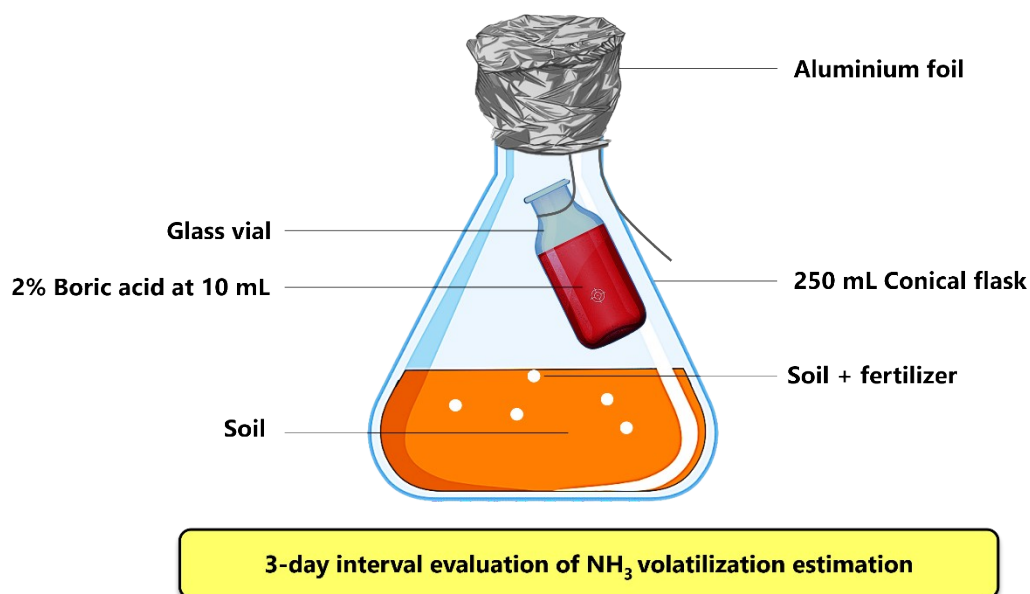

**Figure S1. Experimental setup used for ammonia volatilization estimation employing the boric acid trap method under laboratory incubation conditions.**

Ammonia ( $\text{NH}_3$ ) volatilized from the treated soil was trapped in boric acid solution and quantified at 3-day intervals throughout the incubation period.

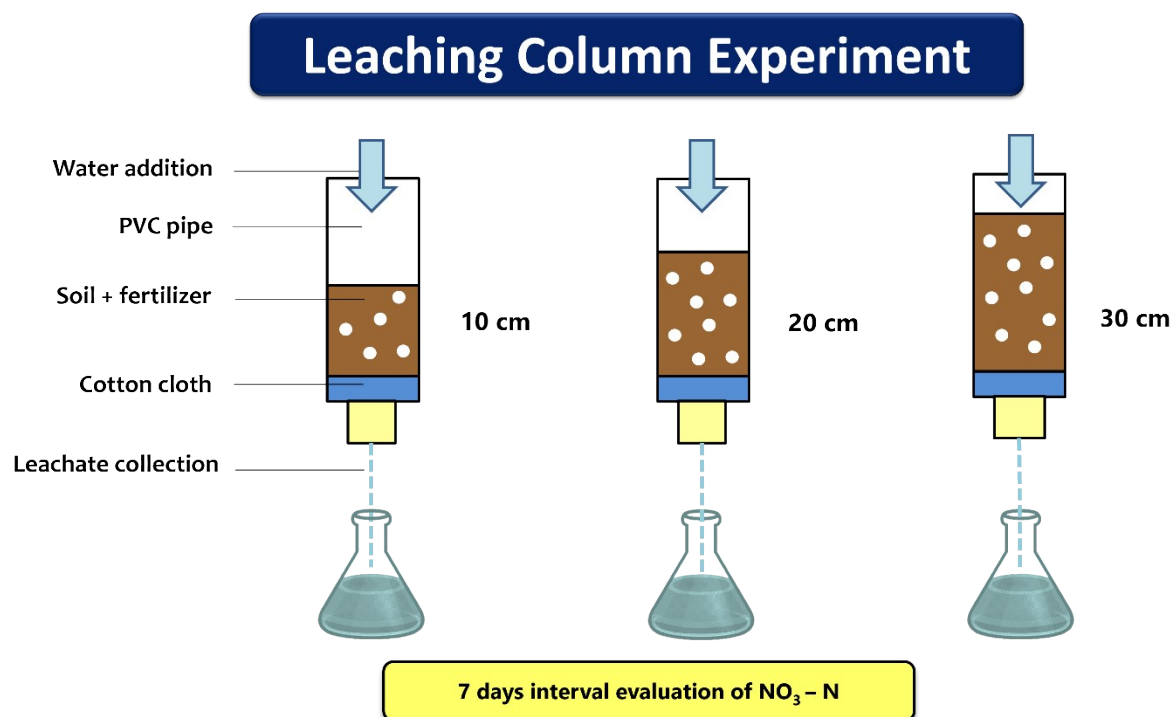

**Figure S2. Schematic representation of the leaching column experiment used to evaluate nitrate-nitrogen ( $\text{NO}_3^- - \text{N}$ ) movement and leaching losses under different fertilizer treatments.**

Leachate samples were collected from the bottom outlet of the soil columns at 7-day intervals throughout the experimental period for  $\text{NO}_3^- - \text{N}$  estimation.

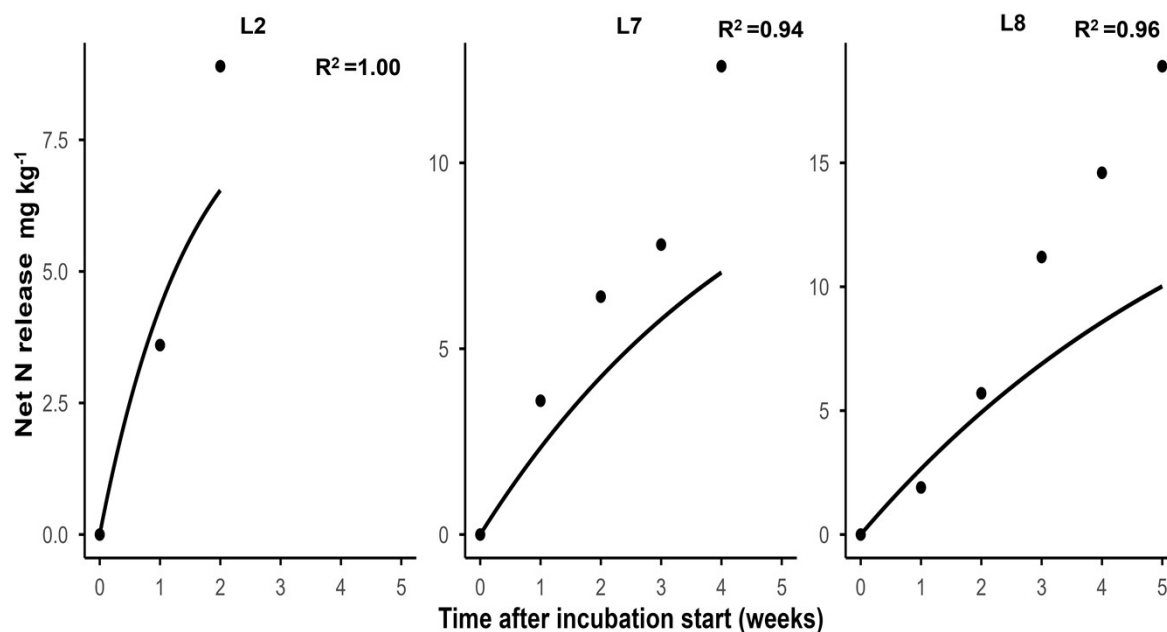

**Figure S3. First-order kinetic modelling of nitrogen release during incubation under representative nitrogen treatments.**

Points indicate observed net N release during the ascending phase, and solid lines represent curves generated from the fitted kinetic parameters reported in Table 3. L2: 100% N as urea; L7: 50% N as urea + 50% N as nano urea; L8: 25% N as urea + 75% N as nano urea.

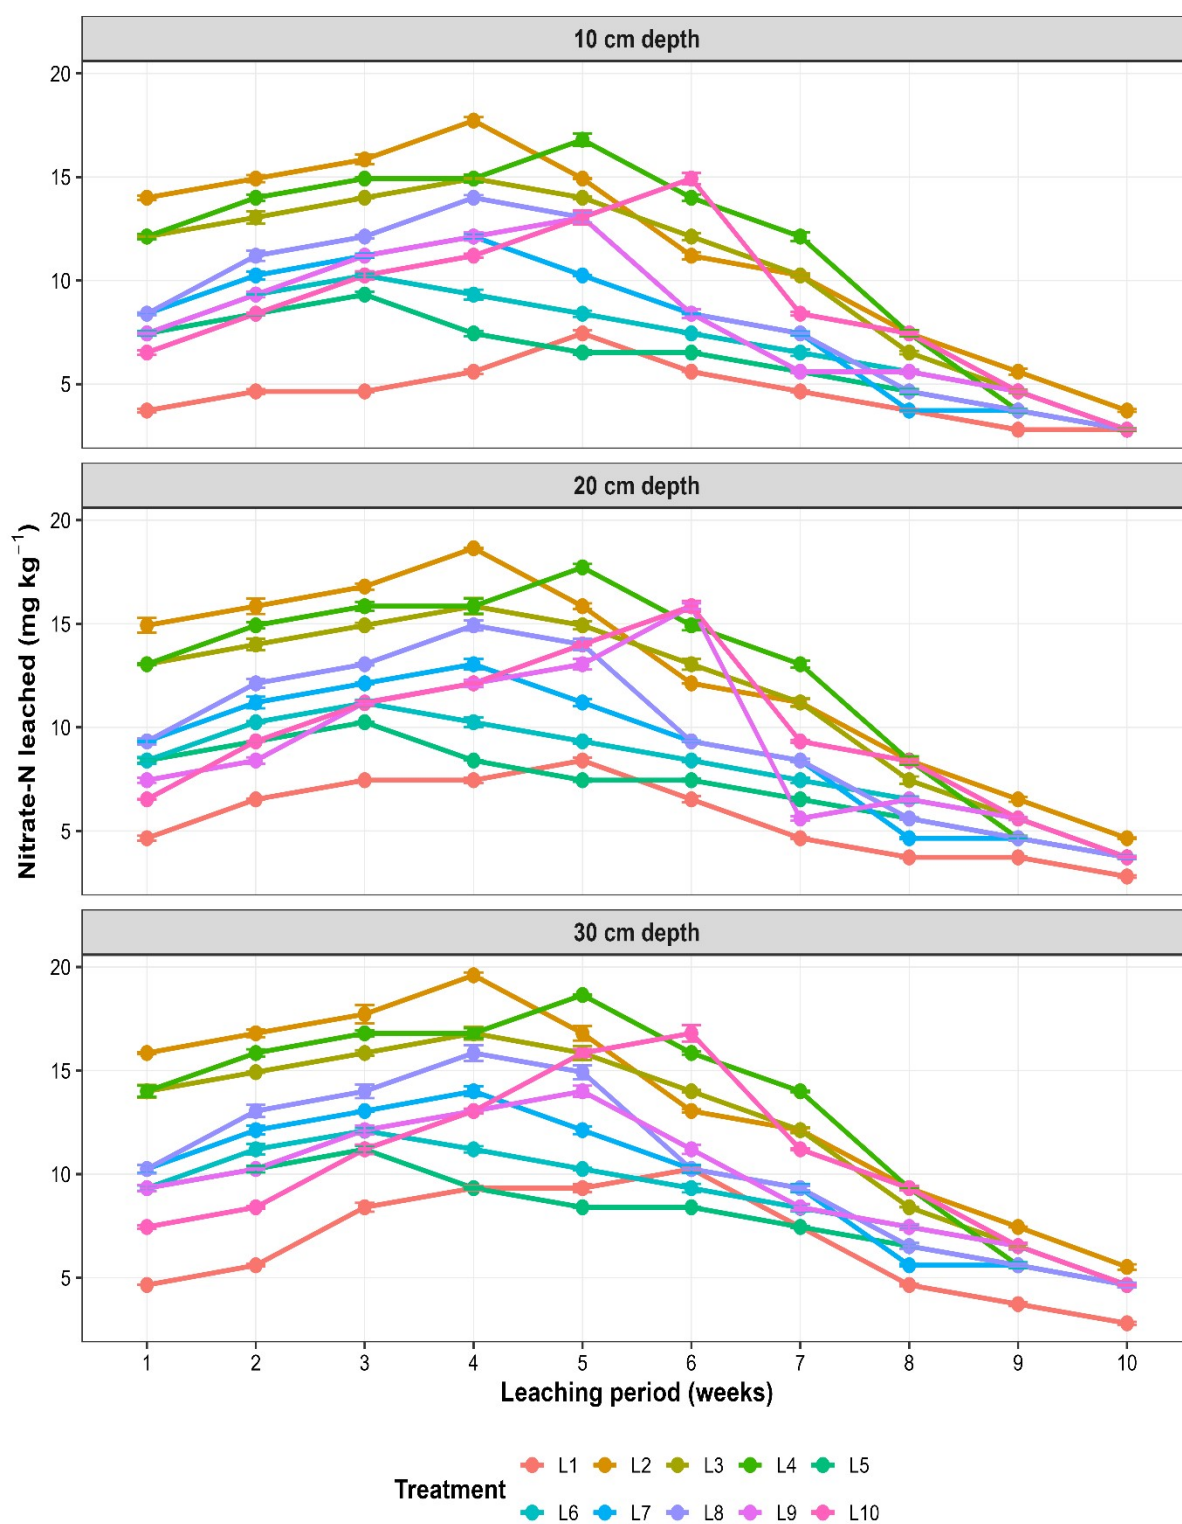

**Figure S4. Temporal dynamics of nitrate (NO<sub>3</sub><sup>-</sup>-N) leaching at different soil depths under different nitrogen treatments.**

L1: Absolute control; L2: 100% N as urea; L3: 75% N as urea; L4: 75% N as urea + 25% N as nano urea; L5: 50% N as urea; L6: 50% N as urea + 25% N as nano urea; L7: 50% N as urea + 50% N as nano urea; L8: 25% N as urea + 75% N as nano urea; L9: 75% N as nano urea; L10: 100% N as nano urea.
